# Supplementary material
Source: Springer Nature journal article supplement (https://www.springermedizin.de/resource/supplementary/12981_2009_115_MOESM2_ESM.pdf/9603858)

A.

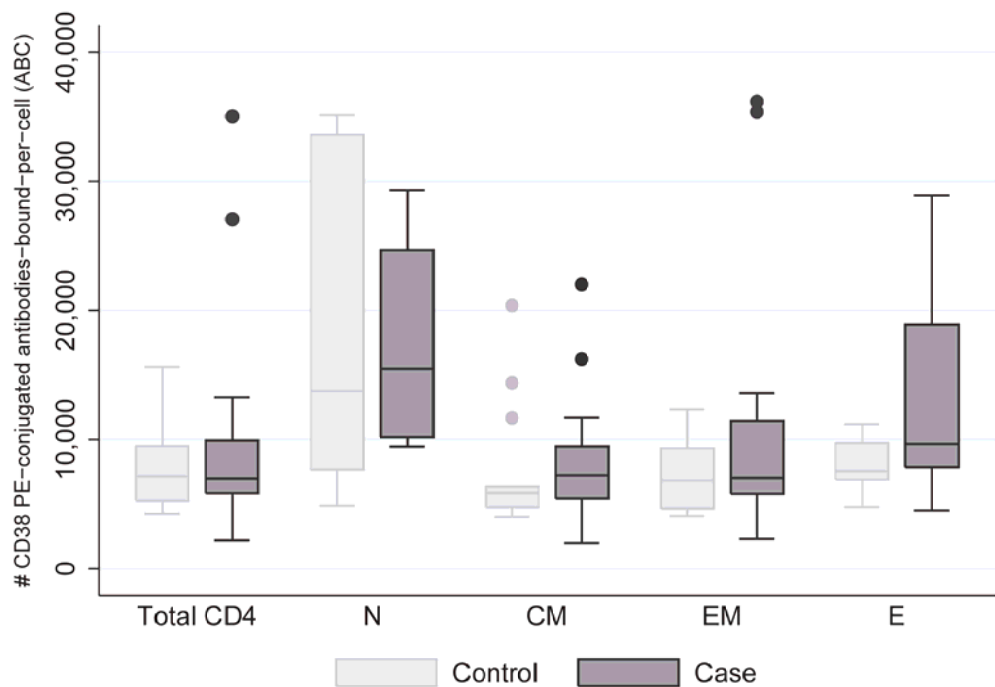

B.

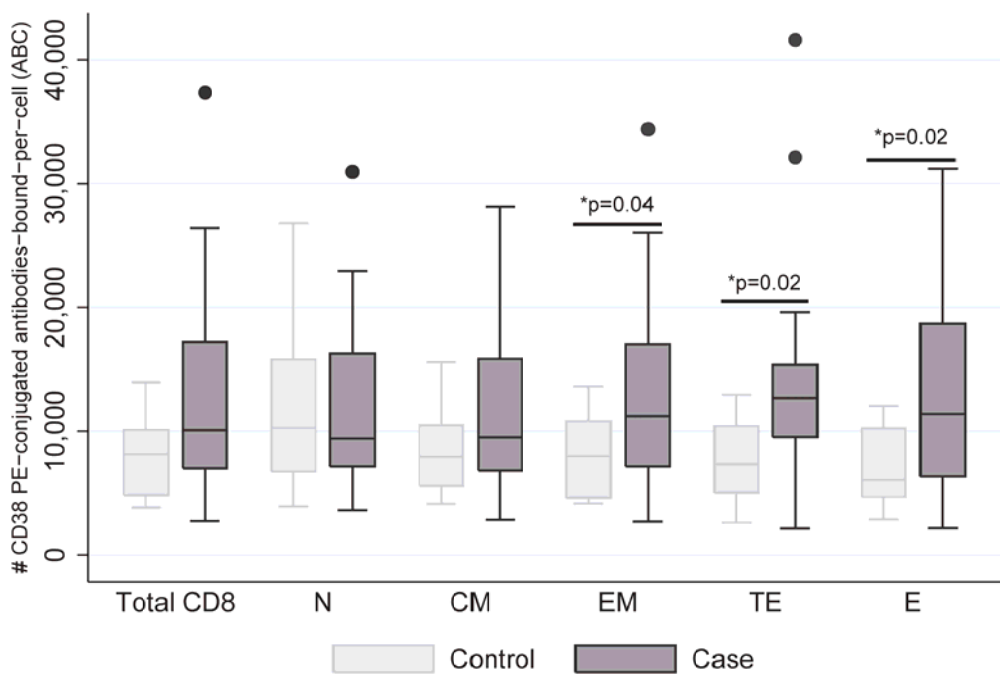

Supplement: MOESM2 [file 9603858]
